# Supplementary material for: Herpesviruses in etiopathogenesis of aggressive periodontitis: A meta-analysis based on case-control studies
Source: PubMed Central journal article supplement (PMC5643052; doi:10.1371/journal.pone.0186373), 2017-10-16
Supplement: pone.0186373.s001.pdf [file pone.0186373.s001.pdf]

S1 Table . Articles Excluded after Critical Appraisal

| Studies                    | Title                                                                                                                                                               | Reasons for exclusion                            |
|----------------------------|---------------------------------------------------------------------------------------------------------------------------------------------------------------------|--------------------------------------------------|
| Winters et al, 1984        | Humoral immune responses to adenoviruses, herpes virus type 1, and <i>Candida albicans</i> in sera of dental patients with oral neoplastic and periodontal diseases | With systemically diseases*                      |
| Madinier et al, 1992       | Epstein-Barr virus DNA detection in gingival tissues of patients undergoing surgical extractions                                                                    | With systemically diseases                       |
| Contreras et al, 1996      | Mammalian viruses in human periodontitis                                                                                                                            | No case-control design^                          |
| Parra et al, 1996          | Detection of human viruses in periodontal pockets using polymerase chain reaction                                                                                   | No case-control design                           |
| Contreras et al, 1998      | Active cytomegalovirus infection in human periodontitis                                                                                                             | No documented data of detection of herpesviruses |
| Contreras et al, 1999      | Herpesvirus infection of inflammatory cells in human periodontitis                                                                                                  | No documented data of detection of herpesviruses |
| Contreras et al, 1999      | Relationship between herpesviruses and adult periodontitis and periodontopathic bacteria                                                                            | No case-control design                           |
| Contreras et al, 2000      | Herpesviruses in periodontal pocket and gingival tissue specimens                                                                                                   | Undefined diagnosis#                             |
| Mardirossian et al, 2000   | Herpesviruses 6, 7 and 8 in HIV- and non-HIV-associated periodontitis                                                                                               | With systemically diseases                       |
| Ting et al, 2000           | Herpesvirus in localized juvenile periodontitis                                                                                                                     | No case-control design                           |
| Contreras et al, 2001      | Herpesviruses in HIV-periodontitis Dentistry                                                                                                                        | With systemically diseases                       |
| Contreras et al, 2001      | Typing of herpes simplex virus from human periodontium                                                                                                              | No case-control design                           |
| Kamma et al, 2001          | Herpes viruses and periodontopathic bacteria in early-onset periodontitis                                                                                           | No case-control design                           |
| Slots et al, 2002          | Detection of human viruses in patients with chronic periodontitis and the relationship between viruses and clinical parameters                                      | No documented data of detection of herpesviruses |
| Cassai et al, 2003         | HHV-6, HHV-7, HHV-8 in gingival biopsies from chronic adult periodontitis patients. A case-control study                                                            | No documented data of detection of herpesviruses |
| Slots et al, 2003          | The herpesvirus- <i>Porphyromonas gingivalis</i> -periodontitis axis                                                                                                | No documented data of detection of herpesviruses |
| Idesawa et al, 2004        | Detection of Epstein-Barr virus in saliva by real-time PCR                                                                                                          | No case-control design                           |
| Konstantinidis et al, 2004 | Relationship between <i>Porphyromonas gingivalis</i> , Epstein-Barr virus infection and reactivation in periodontitis                                               | No case-control design                           |
| Surang et al, 2004         | Association between human herpesviruses and the severity of periodontitis                                                                                           | No case-control design                           |
| Surang et al, 2004         | Prevalence of cytomegalovirus, human herpesvirus-6, and Epstein-Barr virus in periodontitis patients and healthy subjects in the Thai population                    | Undefined diagnosis                              |

|                            |                                                                                                                                                                             |                                                  |
|----------------------------|-----------------------------------------------------------------------------------------------------------------------------------------------------------------------------|--------------------------------------------------|
| Klemenc et al, 2005        | Prevalence of some herpesviruses in gingival crevicular fluid                                                                                                               | Undefined diagnosis                              |
| Konstantinidis et al, 2005 | Real-time polymerase chain reaction quantification of Epstein--Barr virus in chronic periodontitis patients                                                                 | No documented data of detection of herpesviruses |
| Kubar et al, 2005          | Real-time polymerase chain reaction quantification of human cytomegalovirus and Epstein-Barr virus in periodontal pockets and the adjacent gingiva of periodontitis lesions | No case-control design                           |
| Saygun et al, 2005         | Periodontitis lesions are a source of salivary cytomegalovirus and Epstein-Barr virus                                                                                       | No case-control design                           |
| Radvar et al, 2006         | Herpesviruses at human aggressive periodontitis sites                                                                                                                       | No case-control design                           |
| WU et al, 2006             | Infection frequency of Epstein-Barr virus in subgingival samples from patients with different periodontal status and its correlation with clinical parameters               | No documented data of detection of herpesviruses |
| Yildirim et al, 2006       | Detection and quantification of herpesviruses in Kostmann syndrome periodontitis using real-time polymerase chain reaction_ a case report                                   | With systemically diseases                       |
| Watanabe et al, 2006       | EBV-1 and HCMV in aggressive periodontitis in Brazilian patients                                                                                                            | No case-control design                           |
| WU et al, 2007             | Correlation between infections with different genotypes of human cytomegalovirus and Epstein-Barr virus in subgingival samples and periodontal status of patients           | No documented data of detection of herpesviruses |
| Botero et al, 2008         | Comparison of nested polymerase chain reaction (PCR), real-time PCR and viral culture for the detection of cytomegalovirus in subgingival samples                           | Undefined diagnosis                              |
| Chalabi et al, 2008        | EBV and CMV in chronic periodontitis a prevalence study                                                                                                                     | No documented data of detection of herpesviruses |
| Grande et al, 2008         | Herpes viruses in periodontal compromised sites comparison between HIV-positive and -negative patients                                                                      | With systemically diseases                       |
| Imbronito et al, 2008      | Detection of Epstein-Barr virus and human cytomegalovirus in blood and oral samples comparison of three sampling methods                                                    | No case-control design                           |
| Pia et al, 2008            | Human cytomegalovirus and Epstein-Barr virus in apical and marginal periodontitis a role in pathology                                                                       | Undefined diagnosis                              |
| Saygun et al, 2008         | Quantitative analysis of association between herpesviruses and bacterial pathogens in periodontitis                                                                         | No documented data of detection of herpesviruses |
| Sheila et al, 2008         | Occurrence of herpes simplex virus 1 and three periodontal bacteria in patients with chronic periodontitis and necrotic pulp                                                | No documented data of detection of herpesviruses |
| Chalabi et al, 2009        | Herpesviruses in chronic and aggressive periodontitis patients in an Indian population                                                                                      | No case-control design                           |
| Dawson et al, 2009         | Salivary levels of Epstein-Barr virus DNA correlate with subgingival levels, not severity of periodontitis                                                                  | No documented data of detection of herpesviruses |

|                       |                                                                                                                                                       |                                                  |
|-----------------------|-------------------------------------------------------------------------------------------------------------------------------------------------------|--------------------------------------------------|
| Dophus et al, 2009    | Real-time polymerase chain reaction to determine the prevalence and copy number of epstein-barr virus and cytomegalovirus DNA in subgingival plaque   | No documented data of detection of herpesviruses |
| Grenier et al, 2009   | Detection of herpetic viruses in gingival crevicular fluid of patients suffering from periodontal diseases prevalence and effect of treatment         | Undefined diagnosis                              |
| Chalabi et al, 2010   | Periodontopathic bacteria and herpesviruses in chronic periodontitis                                                                                  | No documented data of detection of herpesviruses |
| Sabrina et al, 2011   | Relationship between herpesviruses and periodontopathogens in patients with HIV and periodontitis                                                     | With systemically diseases                       |
| Saygun et al,2011     | Salivary infectious agents and periodontal disease status                                                                                             | No documented data of detection of herpesviruses |
| Thomasini et al, 2011 | Correlation of cytomegalovirus and human herpesvirus 7 with CD3+ and CD3+CD4+ cells in chronic periodontitis patients                                 | No documented data of detection of herpesviruses |
| Ayako et al,2013      | Higher Prevalence of Epstein -Barr Virus DNA in Deeper Periodontal Pockets of Chronic Periodontitis in Japanese Patients                              | No documented data of detection of herpesviruses |
| Leon et al,2013       | The prevalence of human herpes viruses in the saliva of chronic periodontitis patients compared to oral health providers and healthy controls         | No documented data of detection of herpesviruses |
| Kato et al,2014       | Prevalence and quantitative analysis of Epstein -Barr virus DNA and Porphyromonas gingival is associated with Japanese chronic periodontitis patients | No documented data of detection of herpesviruses |
| Petrovic et al,2014   | Detection of herpes simplex virus type 1 in gingival crevicular fluid of gingival sulcus periodontal pocket using polymerase chain reaction           | Undefined diagnosis                              |

---
